# Supplementary material for: NUPR1 is a novel potential biomarker and confers resistance to sorafenib in clear cell renal cell carcinoma by increasing stemness and targeting the PTEN/AKT/mTOR pathway
Source: publisher site journal article supplement (doi:10.18632/aging.203012), 2021-05-24
Supplement: Supplementary file [file aging-v13i10-203012-supplementary-material-SD1.pdf]

SUPPLEMENTARY FIGURES

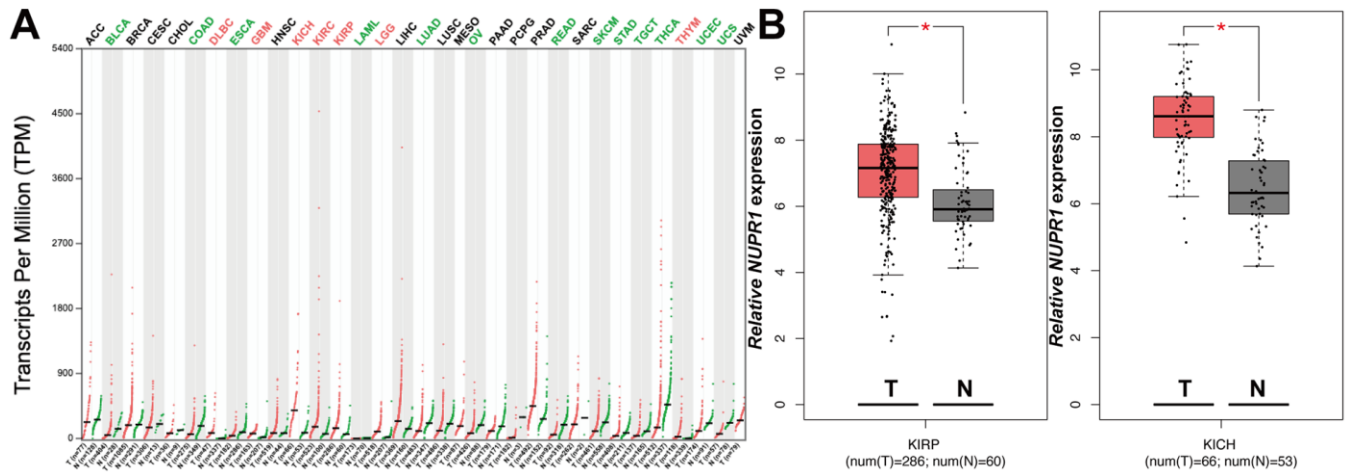

**Supplementary Figure 1. NUPR1 mRNA levels in malignancies.** (A) NUPR1 mRNA expression level in various cancer types in TCGA database. (B) Relative NUPR1 mRNA in TCGA-KIRP and KICH (<http://gepia.cancer-pku.cn>). (\* $p < 0.05$ , \*\* $p < 0.01$ , \*\*\* $p < 0.001$ ). (N.S., No statistical significance). Kidney renal clear cell carcinoma; KICH: Kidney chromophobe cell carcinoma; KIRP: Kidney renal papillary cell carcinoma; TCGA: The Cancer Genome Atlas database.

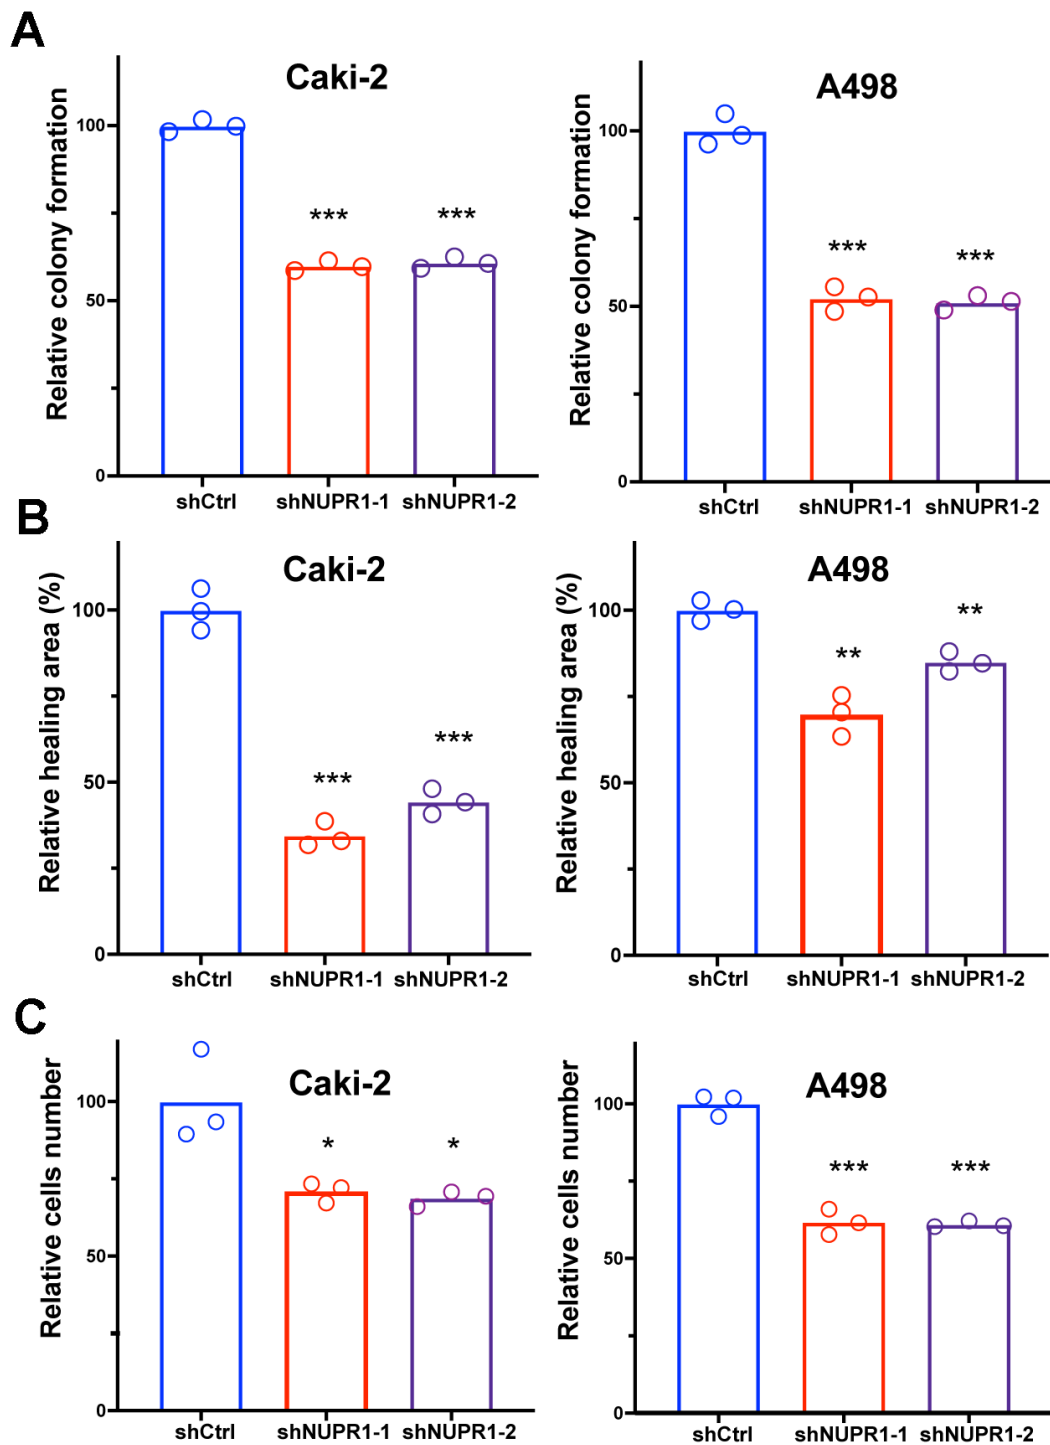

**Supplementary Figure 2. NUPR1 depletion suppressed the proliferation, migration and invasion in ccRCC.** (A) Histogram of colony formation assay for ccRCC cells with NUPR1 depletion. (B) Histogram the wound-healing assay of NUPR1 silencing on the migration of ccRCC cells. (C) Histogram of transwell experiment analysis of the effect of NUPR1 depletion on migratory and invasive abilities of ccRCC cells. (\* $p < 0.05$ , \*\* $p < 0.01$ , \*\*\* $p < 0.001$ ). ccRCC: clear cell renal cell carcinoma.

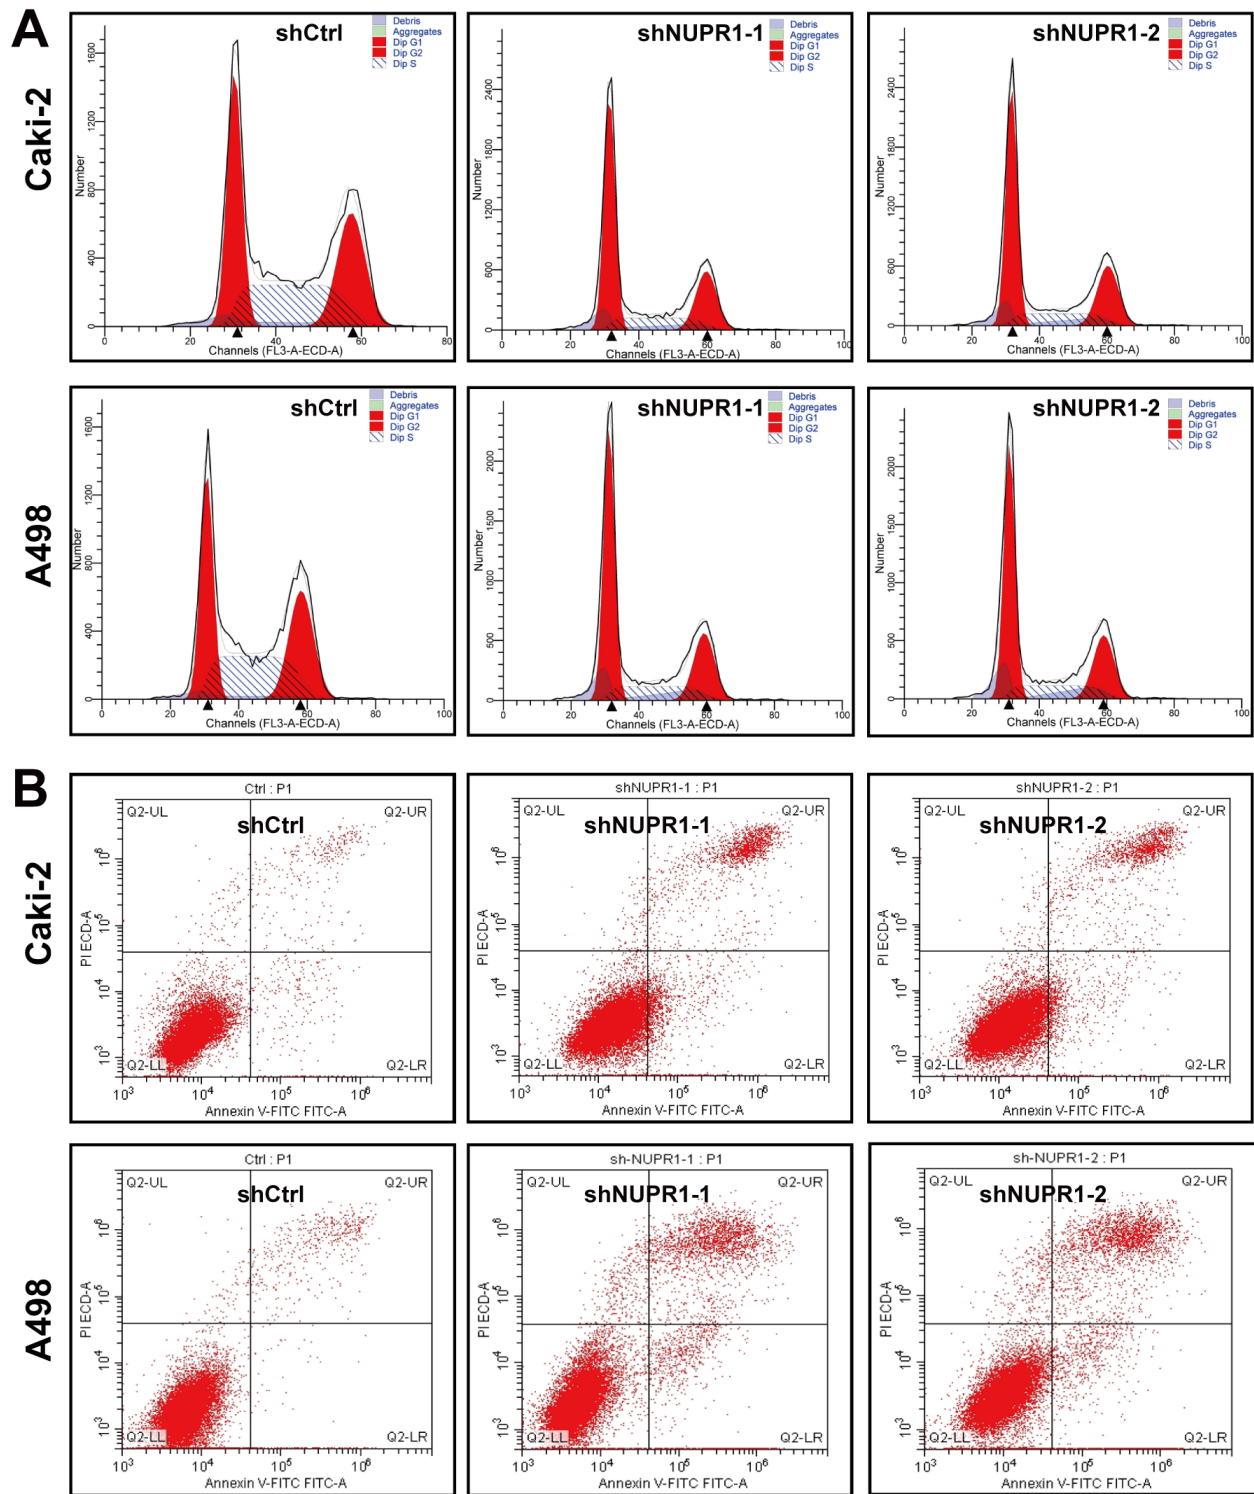

**Supplementary Figure 3. Effects of NUPR1 silencing on cell cycle and apoptosis.** (A) Effects of NUPR1 silencing on cell cycle regulation in ccRCC using flow cytometry. (B) Apoptosis assay of silencing NUPR1 in ccRCC by flow cytometry. (\* $p < 0.05$ , \*\* $p < 0.01$ , \*\*\* $p < 0.001$ ). ccRCC: clear cell renal cell carcinoma.

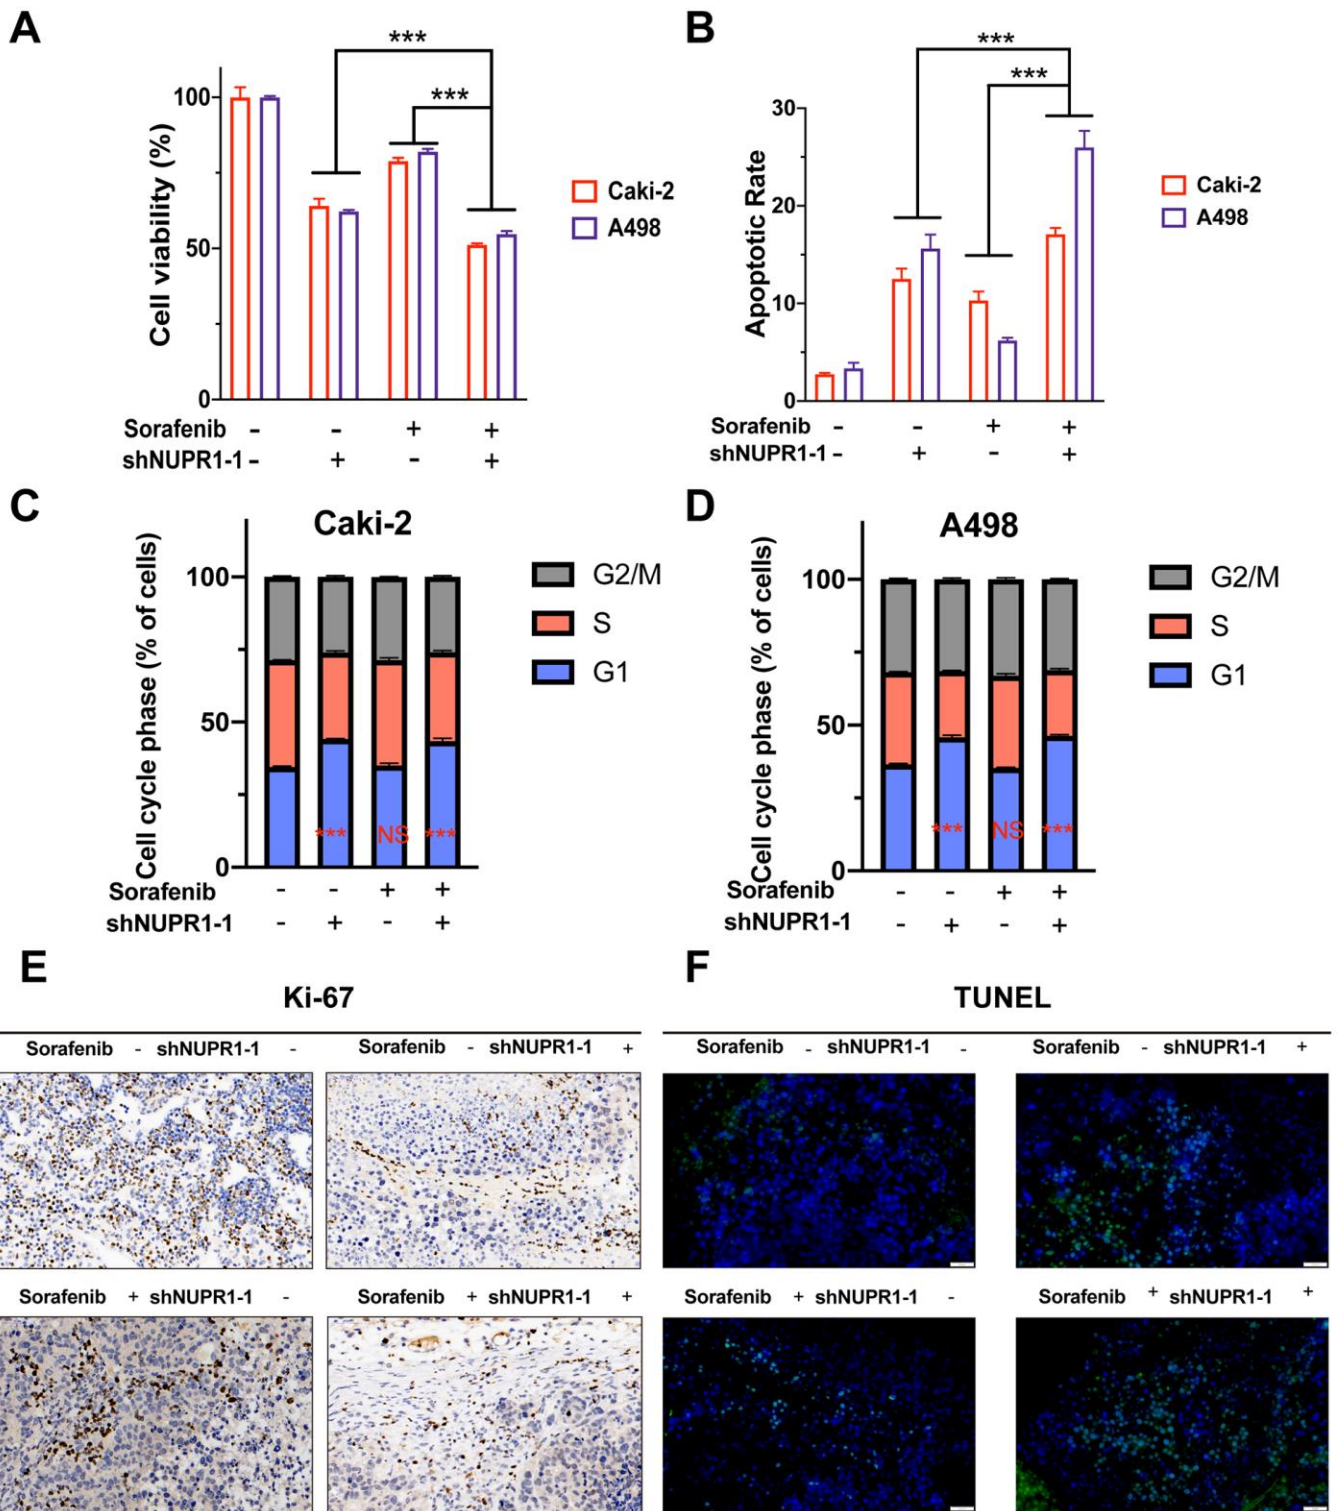

**Supplementary Figure 4. Effects of sorafenib and NUPR1 silencing on proliferation, cell cycle and apoptosis.** (A) The cells with NUPR1 silencing were treated with sorafenib (5 $\mu$ M) for 48 h. Cell viability was determined by CCK-8 assay. (B) Apoptosis assay of silencing NUPR1 with sorafenib treatment in ccRCC by flow cytometry. (C, D) Effects of NUPR1 silencing and sorafenib on cell cycle regulation in ccRCC using flow cytometry. (E) Ki-67 expression were detected by IHC in xenografts sections. (F) Apoptosis assessed by TUNEL in xenografts sections. (\* $p$  < 0.05, \*\* $p$  < 0.01, \*\*\* $p$  < 0.001). ccRCC: clear cell renal cell carcinoma.

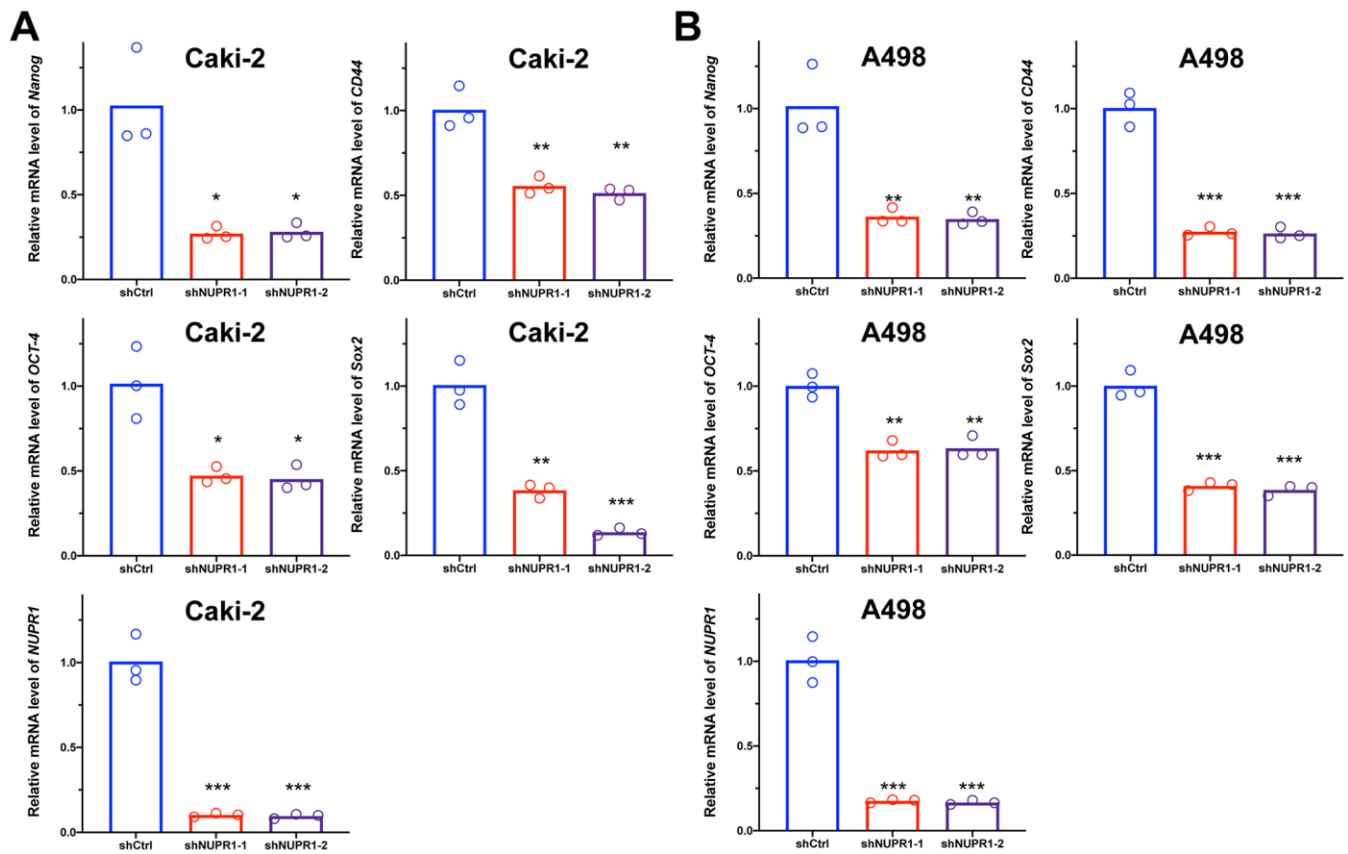

**Supplementary Figure 5. NUPR1 silencing mediated stem-related biomarkers mRNA transcription.** (A) NUPR1 silencing decreased stem-related biomarkers mRNA level in ccRCC cell Caki-2 verified by qRT-PCR. (B) NUPR1 silencing suppressed stem-related biomarkers mRNA level in ccRCC cell A498 analyzed by qRT-PCR. (\* $p < 0.05$ , \*\* $p < 0.01$ , \*\*\* $p < 0.001$ ). ccRCC: clear cell renal cell carcinoma; qRT-PCR: quantitative real-time reverse transcription PCR.
