# Supplementary material for: NUPR1 is a novel potential biomarker and confers resistance to sorafenib in clear cell renal cell carcinoma by increasing stemness and targeting the PTEN/AKT/mTOR pathway
Source: publisher site journal article supplement (doi:10.18632/aging.203012), 2021-05-24
Supplement: Supplementary file [file aging-v13i10-203012-supplementary-material-SD2.pdf]

## SUPPLEMENTARY TABLE

**Supplementary Table 1. Primers sequences.**

| <b>Sequence</b> | <b>Forward</b>         | <b>Reverse</b>        |
|-----------------|------------------------|-----------------------|
| CD44            | CAGCTCATACCAGCCATCCA   | GCCTCATCTCCAGCTCTGTC  |
| Nanog           | CCCCTAATTTGTTGGTTGTGCT | GCTAATTTCTTCTCCACCCCA |
| NUPR1           | TCGGAGGTGGAGGCCG       | GCCTCATCTCCAGCTCTGTC  |
| OCT4            | CCTTCGCAAGCCCTCATTTC   | TAGCCAGGTCCGAGGATCAA  |
| SOX2            | CATGAAGGAGCACCCGGATT   | ATGTGCGCGTAACTGTCCAT  |
